# Supplementary material for: Fabrication and Characterization of Submicron-Scale Bovine Hydroxyapatite: A Top-Down Approach for a Natural Biomaterial
Source: MDPI journal article supplement (doi:10.3390/ma15062324), 2022-03-21
Supplement: s1 [file s1]

Supplementary

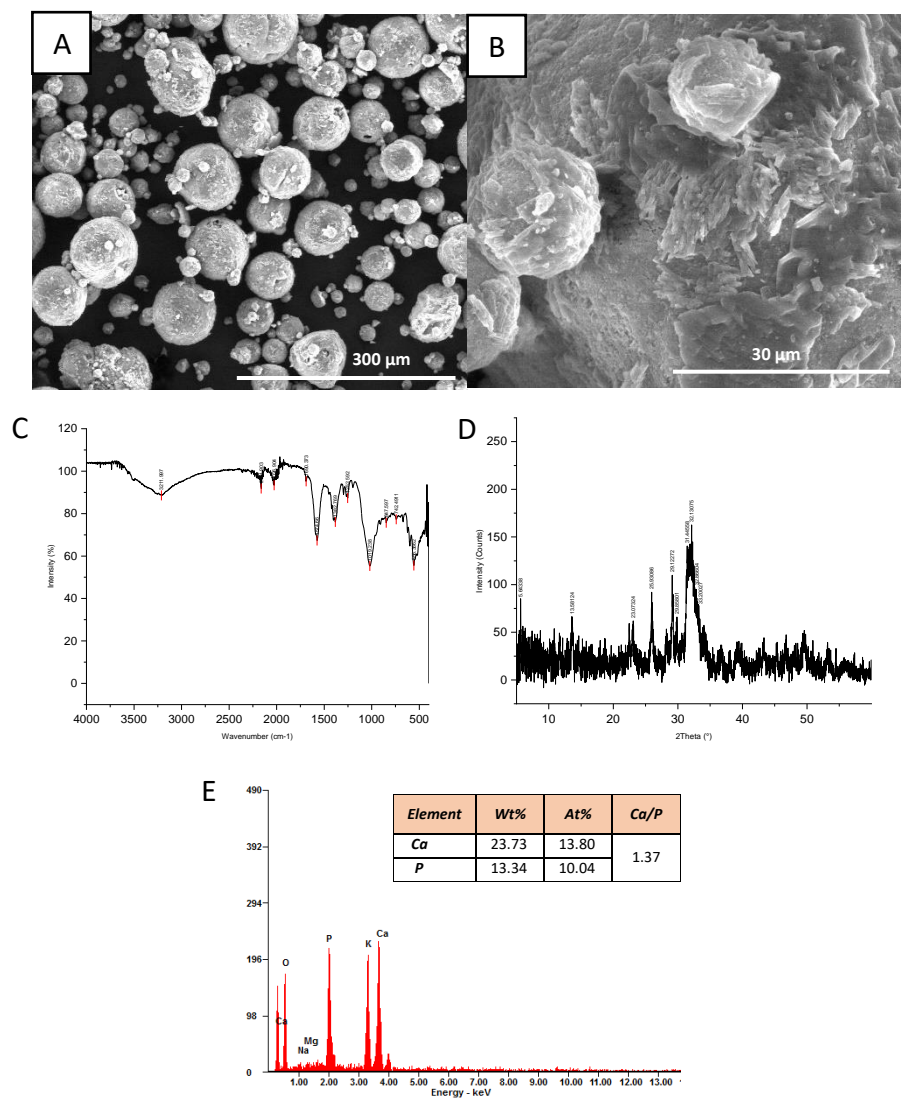

**Figure S1.** Characteristics of synthetic HA. SEM images (A-B), FTIR spectra (C), XRD spectra (D), elemental composition from EDX.
